# Supplementary material for: Association of different iron deficiency cutoffs with adverse outcomes in chronic kidney disease
Source: PubMed Central journal article supplement (PMC6134584; doi:10.1186/s12882-018-1021-3), 2018-09-12
Supplement: 12882_2018_1021_MOESM2_ESM.pdf [file 12882_2018_1021_MOESM2_ESM.pdf]

**Supplemental Table 2.** Different cutoff values of ferritin and TSAT, adjusted for age and sex, with respect to risk of cardiovascular mortality in CKD patients (based on eGFR <60 ml/min/1.73m<sup>2</sup> or albuminuria >30 mg/24 hours or albumin-to-creatinine ratio ≥ 30 mg/g)

| TSAT (%) | HR (95%CI)              | Ferritin (µg/L) | HR (95%CI)        |
|----------|-------------------------|-----------------|-------------------|
| <10      | <b>4.15 (1.78-9.66)</b> | <20             | 0.52 (0.07-3.77)  |
| <15      | 1.79 (0.98-3.27)        | <50             | 1.09 (0.54-2.21)  |
| <20      | 1.28 (0.78-2.10)        | <100            | 1.12 (0.69-1.81)  |
| <25      | 1.10 (0.69-1.78)        | <200            | 1.55 (0.88-2.72)  |
| <30      | 1.88 (1.01-3.51)        | <300            | 1.53 (0.73-3.20)  |
|          |                         | <500            | 3.51 (0.49-25.28) |

  

| AND TSAT | FERRITIN <20     | <50                     | <100                    | <200                    | <300                    | <500                    |
|----------|------------------|-------------------------|-------------------------|-------------------------|-------------------------|-------------------------|
| <10      | 1.09 (0.15-7.99) | <b>3.31 (1.20-9.20)</b> | <b>4.17 (1.79-9.70)</b> | <b>4.16 (1.79-9.69)</b> | <b>4.16 (1.79-9.69)</b> | <b>4.16 (1.79-9.69)</b> |
| <15      | 0.76 (0.10-5.84) | <b>2.08 (0.90-4.81)</b> | <b>2.07 (1.03-4.18)</b> | <b>1.85 (0.99-3.45)</b> | 1.81 (0.97-3.37)        | 1.81 (0.99-3.31)        |
| <20      | 0.60 (0.08-4.33) | 1.39 (0.63-3.05)        | 1.14 (0.61-2.13)        | 1.57 (0.95-2.58)        | 1.40 (0.85-2.30)        | 1.32 (0.81-2.16)        |
| <25      | 0.55 (0.08-4.01) | 1.27 (0.59-2.61)        | 1.07 (0.63-1.81)        | 1.17 (0.73-1.88)        | 1.26 (0.79-2.03)        | 1.15 (0.71-1.85)        |
| <30      | 0.52 (0.07-3.87) | 1.18 (0.58-2.40)        | 1.36 (0.84-2.22)        | <b>1.74 (1.06-2.86)</b> | <b>1.75 (1.02-3.00)</b> | <b>2.05 (1.10-3.82)</b> |

**Conditional definitions:**

|                                                                       |                  |
|-----------------------------------------------------------------------|------------------|
| Ferritin <100 µg/L or TSAT <10% with ferritin 100-199 µg/L            | 1.09 (0.75-1.58) |
| Ferritin <100 µg/L or TSAT <10% with ferritin 100-299 µg/L            | 1.09 (0.75-1.58) |
| Ferritin <100 µg/L or TSAT <15% with ferritin 100-199 µg/L            | 1.12 (0.77-1.63) |
| Ferritin <100 µg/L or TSAT <15% with ferritin 100-299 µg/L            | 1.11 (0.77-1.61) |
| Ferritin <100 µg/L or TSAT <20% with ferritin 100-199 µg/L (FIND-CKD) | 1.33 (0.92-1.92) |
| Ferritin <100 µg/L or TSAT <20% with ferritin 100-299 µg/L (FAIR-HF)  | 1.38 (0.86-2.22) |
