# Supplementary material for: Association of different iron deficiency cutoffs with adverse outcomes in chronic kidney disease
Source: PubMed Central journal article supplement (PMC6134584; doi:10.1186/s12882-018-1021-3), 2018-09-12
Supplement: 12882_2018_1021_MOESM3_ESM.pdf [file 12882_2018_1021_MOESM3_ESM.pdf]

**Supplemental Table 3.** Different cutoff values of ferritin and TSAT, adjusted for age and sex, with respect to risk of anemia in CKD patients

(based on eGFR<60 ml/min/1.73m<sup>2</sup> or albuminuria >30 mg/24 hours or albumin-to-creatinine ratio ≥ 30 mg/g)

| <b>TSAT (%)</b> | <b>HR (95%CI)</b>       | <b>Ferritin (µg/L)</b> | <b>HR (95%CI)</b>       |
|-----------------|-------------------------|------------------------|-------------------------|
| <10             | <b>3.07 (1.69-5.57)</b> | <20                    | <b>2.95 (1.75-4.98)</b> |
| <15             | <b>2.09 (1.43-3.04)</b> | <50                    | <b>1.83 (1.24-2.69)</b> |
| <20             | <b>1.62 (1.18-2.21)</b> | <100                   | <b>1.83 (1.34-2.50)</b> |
| <25             | <b>1.60 (1.16-2.23)</b> | <200                   | <b>1.59 (1.09-2.32)</b> |
| <30             | <b>1.69 (1.14-2.51)</b> | <300                   | 1.67 (0.96-2.91)        |
|                 |                         | <500                   | 6.94 (0.97-49.59)       |

| <b>AND TSAT</b> | <b>FERRITIN</b> | <20                     | <50                     | <100                    | <200                    | <300                    | <500                    |
|-----------------|-----------------|-------------------------|-------------------------|-------------------------|-------------------------|-------------------------|-------------------------|
| <10             |                 | 2.04 (0.94-4.39)        | <b>2.64 (1.38-5.04)</b> | <b>3.07 (1.69-5.57)</b> | <b>3.07 (1.69-5.57)</b> | <b>3.07 (1.69-5.57)</b> | <b>3.07 (1.69-5.57)</b> |
| <15             |                 | <b>2.51 (1.34-4.70)</b> | <b>2.42 (1.49-3.94)</b> | <b>2.53 (1.64-3.91)</b> | <b>2.23 (1.52-3.28)</b> | <b>2.14 (1.46-3.12)</b> | <b>2.13 (1.46-3.10)</b> |
| <20             |                 | <b>2.51 (1.40-4.50)</b> | <b>2.00 (1.29-3.10)</b> | <b>1.92 (1.34-2.78)</b> | <b>1.80 (1.30-2.48)</b> | <b>1.67 (1.22-2.30)</b> | <b>1.61 (1.18-2.21)</b> |
| <25             |                 | <b>2.96 (1.73-5.04)</b> | <b>2.06 (1.37-3.09)</b> | <b>1.83 (1.32-2.52)</b> | <b>1.93 (1.40-2.65)</b> | <b>1.64 (1.19-2.27)</b> | <b>1.63 (1.17-2.25)</b> |
| <30             |                 | <b>2.87 (1.68-4.90)</b> | <b>1.89 (1.27-2.80)</b> | <b>1.86 (1.36-2.56)</b> | <b>1.90 (1.36-2.65)</b> | <b>1.69 (1.18-2.42)</b> | <b>1.76 (1.19-2.60)</b> |

**Conditional definitions:**

|                                                                       |                         |
|-----------------------------------------------------------------------|-------------------------|
| Ferritin <100 µg/L or TSAT <10% with ferritin 100-199 µg/L            | <b>2.33 (1.99-2.73)</b> |
| Ferritin <100 µg/L or TSAT <10% with ferritin 100-299 µg/L            | <b>2.33 (1.99-2.73)</b> |
| Ferritin <100 µg/L or TSAT <15% with ferritin 100-199 µg/L            | <b>2.39 (2.04-2.80)</b> |
| Ferritin <100 µg/L or TSAT <15% with ferritin 100-299 µg/L            | <b>2.37 (2.02-2.78)</b> |
| Ferritin <100 µg/L or TSAT <20% with ferritin 100-199 µg/L (FIND-CKD) | <b>2.35 (1.99-2.77)</b> |
| Ferritin <100 µg/L or TSAT <20% with ferritin 100-299 µg/L (FAIR-HF)  | <b>1.92 (1.38-2.66)</b> |
