# Supplementary material for: Association of different iron deficiency cutoffs with adverse outcomes in chronic kidney disease
Source: PubMed Central journal article supplement (PMC6134584; doi:10.1186/s12882-018-1021-3), 2018-09-12
Supplement: 12882_2018_1021_MOESM5_ESM.pdf [file 12882_2018_1021_MOESM5_ESM.pdf]

**Supplemental Table 7.** Different cutoff values of ferritin and TSAT, adjusted for age, sex, hs-CRP, and albumin, with risk of all-cause mortality in 717 CKD patients (based on eGFR<60 ml/min/1.73m<sup>2</sup> or albuminuria >30 mg/24 hours or albumin-to-creatinine ratio ≥ 30 mg/g)

| TSAT (%) | HR (95%CI)              | Ferritin (µg/L) | HR (95%CI)        |
|----------|-------------------------|-----------------|-------------------|
| <10      | <b>2.87 (1.45-5.68)</b> | <20             | 0.61 (0.15-2.48)  |
| <15      | 1.40 (0.87-2.26)        | <50             | 1.47 (0.91-2.38)  |
| <20      | 1.24 (0.85-1.81)        | <100            | 1.08 (0.75-1.55)  |
| <25      | 1.37 (0.95-1.96)        | <200            | 1.36 (0.91-2.02)  |
| <30      | <b>2.17 (1.33-3.53)</b> | <300            | 1.64 (0.92-2.92)  |
|          |                         | <500            | 2.87 (0.71-11.62) |

| AND TSAT | FERRITIN | <20              | <50                     | <100                    | <200                    | <300                    | <500                    |
|----------|----------|------------------|-------------------------|-------------------------|-------------------------|-------------------------|-------------------------|
| <10      |          | 1.16 (0.28-4.77) | <b>2.38 (1.04-5.44)</b> | <b>2.54 (1.24-5.20)</b> | <b>2.87 (1.45-5.68)</b> | <b>2.87 (1.45-5.68)</b> | <b>2.87 (1.45-5.68)</b> |
| <15      |          | 0.72 (0.18-2.90) | 1.81 (0.94-3.47)        | 1.64 (0.95-2.84)        | 1.57 (0.96-2.55)        | 1.49 (0.91-2.43)        | 1.43 (0.88-2.30)        |
| <20      |          | 0.65 (0.16-2.62) | 1.34 (0.72-2.49)        | 1.01 (0.63-1.64)        | 1.44 (0.98-2.01)        | 1.34 (0.92-1.95)        | 1.29 (0.89-1.88)        |
| <25      |          | 0.61 (0.15-2.49) | 1.52 (0.89-2.59)        | 1.11 (0.75-1.64)        | 1.41 (0.99-1.99)        | <b>1.52 (1.07-2.17)</b> | <b>1.44 (1.00-2.06)</b> |
| <30      |          | 0.61 (0.15-2.49) | 1.56 (0.96-2.52)        | 1.26 (0.88-1.81)        | <b>1.69 (1.18-2.43)</b> | <b>2.04 (1.35-3.08)</b> | <b>2.11 (1.32-3.38)</b> |

**Conditional definitions:**

|                                                                       |                         |
|-----------------------------------------------------------------------|-------------------------|
| Ferritin <100 µg/L or TSAT <10% with ferritin 100-199 µg/L            | 1.12 (0.78-1.60)        |
| Ferritin <100 µg/L or TSAT <10% with ferritin 100-299 µg/L            | 1.12 (0.78-1.60)        |
| Ferritin <100 µg/L or TSAT <15% with ferritin 100-199 µg/L            | 1.11 (0.78-1.58)        |
| Ferritin <100 µg/L or TSAT <15% with ferritin 100-299 µg/L            | 1.09 (0.77-1.55)        |
| Ferritin <100 µg/L or TSAT <20% with ferritin 100-199 µg/L (FIND-CKD) | <b>1.41 (1.00-2.00)</b> |
| Ferritin <100 µg/L or TSAT <20% with ferritin 100-299 µg/L (FAIR-HF)  | 1.32 (0.93-1.87)        |

**Supplemental Table 8.** Different cutoff values of ferritin and TSAT, adjusted for age, sex, hs-CRP, and albumin, with risk of cardiovascular mortality in CKD patients (based on eGFR<60 ml/min/1.73m<sup>2</sup> or albuminuria >30 mg/24 hours or albumin-to-creatinine ratio ≥ 30 mg/g)

| TSAT (%) | HR (95%CI)               | Ferritin (µg/L) | HR (95%CI)               |
|----------|--------------------------|-----------------|--------------------------|
| <10      | <b>5.50 (2.32-12.99)</b> | <20             | 0.88 (0.12-6.41)         |
| <15      | <b>2.41 (1.23-4.74)</b>  | <50             | 1.51 (0.70-3.25)         |
| <20      | <b>1.80 (1.00-3.23)</b>  | <100            | 1.21 (0.69-2.14)         |
| <25      | 1.31 (0.74-2.33)         | <200            | <b>2.11 (1.01-4.38)</b>  |
| <30      | <b>2.38 (1.07-5.31)</b>  | <300            | <b>4.16 (1.00-17.21)</b> |
|          |                          | <500            | -                        |

  

| AND TSAT | FERRITIN | <20               | <50                      | <100                     | <200                     | <300                     | <500                     |
|----------|----------|-------------------|--------------------------|--------------------------|--------------------------|--------------------------|--------------------------|
| <10      |          | 1.90 (0.26-14.05) | <b>4.81 (1.70-13.59)</b> | <b>5.51 (2.33-13.01)</b> | <b>5.50 (2.33-12.99)</b> | <b>5.50 (2.33-12.99)</b> | <b>5.50 (2.33-12.99)</b> |
| <15      |          | 1.09 (0.15-7.94)  | <b>3.20 (1.34-7.63)</b>  | <b>3.02 (1.45-6.28)</b>  | <b>2.57 (1.28-5.15)</b>  | <b>2.46 (1.23-4.94)</b>  | <b>2.46 (1.25-4.83)</b>  |
| <20      |          | 0.93 (0.13-6.78)  | 2.04 (0.86-4.84)         | 1.25 (0.60-2.58)         | <b>2.19 (1.22-3.91)</b>  | <b>1.92 (1.07-3.43)</b>  | <b>1.88 (1.05-3.35)</b>  |
| <25      |          | 0.88 (0.12-6.44)  | 1.74 (0.77-3.94)         | 1.08 (0.58-2.02)         | 1.41 (0.81-2.47)         | 1.55 (0.88-2.73)         | 1.38 (0.77-2.44)         |
| <30      |          | 0.88 (0.12-6.44)  | 1.60 (0.74-3.45)         | <b>1.47 (0.83-2.59)</b>  | <b>2.38 (1.28-4.43)</b>  | <b>2.69 (1.30-5.54)</b>  | <b>2.61 (1.17-5.80)</b>  |

**Conditional definitions:**

|                                                                       |                         |
|-----------------------------------------------------------------------|-------------------------|
| Ferritin <100 µg/L or TSAT <10% with ferritin 100-199 µg/L            | 1.21 (0.69-2.14)        |
| Ferritin <100 µg/L or TSAT <10% with ferritin 100-299 µg/L            | 1.21 (0.69-2.14)        |
| Ferritin <100 µg/L or TSAT <15% with ferritin 100-199 µg/L            | 1.22 (0.70-2.14)        |
| Ferritin <100 µg/L or TSAT <15% with ferritin 100-299 µg/L            | 1.20 (0.69-2.10)        |
| Ferritin <100 µg/L or TSAT <20% with ferritin 100-199 µg/L (FIND-CKD) | <b>2.04 (1.15-3.63)</b> |
| Ferritin <100 µg/L or TSAT <20% with ferritin 100-299 µg/L (FAIR-HF)  | <b>1.87 (1.05-3.33)</b> |

**Supplemental Table 9.** Different cutoff values of ferritin and TSAT, adjusted for age, sex, hs-CRP, and albumin, with risk of anemia in CKD patients (based on eGFR<60 ml/min/1.73m<sup>2</sup> or albuminuria >30 mg/24 hours or albumin-to-creatinine ratio ≥ 30 mg/g)

| <b>TSAT (%)</b> | <b>HR (95%CI)</b>       | <b>Ferritin (µg/L)</b> | <b>HR (95%CI)</b>       |
|-----------------|-------------------------|------------------------|-------------------------|
| <10             | <b>2.82 (1.29-6.19)</b> | <20                    | <b>2.81 (1.37-5.76)</b> |
| <15             | <b>2.31 (1.44-3.69)</b> | <50                    | <b>1.91 (1.19-3.06)</b> |
| <20             | <b>1.57 (1.06-2.33)</b> | <100                   | <b>1.52 (1.03-2.25)</b> |
| <25             | <b>1.75 (1.17-2.62)</b> | <200                   | 1.24 (0.79-1.94)        |
| <30             | <b>1.78 (1.10-2.87)</b> | <300                   | 1.17 (0.63-2.15)        |
|                 |                         | <500                   | 4.32 (0.60-30.79)       |

  

| <b>AND<br/>TSAT</b> | <b>FERRITIN</b> | <b>&lt;20</b>           | <b>&lt;50</b>           | <b>&lt;100</b>          | <b>&lt;200</b>          | <b>&lt;300</b>          | <b>&lt;500</b>          |
|---------------------|-----------------|-------------------------|-------------------------|-------------------------|-------------------------|-------------------------|-------------------------|
| <10                 |                 | 2.02 (0.72-5.64)        | 2.17 (0.87-5.42)        | <b>2.82 (1.29-6.19)</b> | <b>2.82 (1.29-6.19)</b> | <b>2.82 (1.29-6.19)</b> | <b>2.82 (1.29-6.19)</b> |
| <15                 |                 | <b>2.62 (1.12-6.11)</b> | <b>2.59 (1.37-4.91)</b> | <b>2.48 (1.42-4.32)</b> | <b>2.45 (1.51-3.99)</b> | <b>2.36 (1.46-3.82)</b> | <b>2.38 (1.49-3.82)</b> |
| <20                 |                 | 2.06 (0.89-4.80)        | <b>1.82 (1.02-3.23)</b> | <b>1.50 (0.95-2.38)</b> | <b>1.61 (1.08-2.42)</b> | <b>1.52 (1.02-2.23)</b> | <b>1.54 (1.04-2.23)</b> |
| <25                 |                 | <b>2.59 (1.22-5.48)</b> | <b>2.02 (1.21-3.38)</b> | <b>1.51 (1.02-2.26)</b> | <b>1.81 (1.23-2.65)</b> | <b>1.60 (1.08-2.35)</b> | <b>1.73 (1.16-2.58)</b> |
| <30                 |                 | <b>2.59 (1.22-5.48)</b> | <b>1.93 (1.19-3.14)</b> | <b>1.55 (1.05-2.29)</b> | <b>1.72 (1.15-2.57)</b> | <b>1.53 (1.00-2.35)</b> | <b>1.80 (1.22-2.88)</b> |

**Conditional definitions:**

|                                                                       |                         |
|-----------------------------------------------------------------------|-------------------------|
| Ferritin <100 µg/L or TSAT <10% with ferritin 100-199 µg/L            | <b>1.52 (1.03-2.25)</b> |
| Ferritin <100 µg/L or TSAT <10% with ferritin 100-299 µg/L            | <b>1.52 (1.03-2.25)</b> |
| Ferritin <100 µg/L or TSAT <15% with ferritin 100-199 µg/L            | <b>1.68 (1.14-2.47)</b> |
| Ferritin <100 µg/L or TSAT <15% with ferritin 100-299 µg/L            | <b>1.68 (1.14-2.47)</b> |
| Ferritin <100 µg/L or TSAT <20% with ferritin 100-199 µg/L (FIND-CKD) | <b>1.74 (1.18-2.58)</b> |
| Ferritin <100 µg/L or TSAT <20% with ferritin 100-299 µg/L (FAIR-HF)  | <b>1.71 (1.15-2.55)</b> |
