# Supplementary material for: Association of different iron deficiency cutoffs with adverse outcomes in chronic kidney disease
Source: Springer Nature journal article supplement (doi:10.1186/s12882-018-1021-3), 2018-09-12
Supplement: MOESM4 [file 16117598]

**Supplemental Table 4.** Different cutoff values of ferritin and TSAT, adjusted for age and sex, with risk of all-cause mortality in CKD patients

with eGFR<60 ml/min/1.73m<sup>2</sup>

| TSAT (%) | HR (95%CI)              | Ferritin (µg/L) | HR (95%CI)              |
|----------|-------------------------|-----------------|-------------------------|
| <10      | <b>3.23 (1.39-7.51)</b> | <20             | 0.92 (0.23-3.76)        |
| <15      | <b>1.84 (1.03-3.30)</b> | <50             | 1.48 (0.79-2.76)        |
| <20      | 1.29 (0.80-2.06)        | <100            | 1.35 (0.86-2.11)        |
| <25      | 1.39 (0.86-2.23)        | <200            | 1.63 (0.95-2.80)        |
| <30      | <b>3.39 (1.63-7.05)</b> | <300            | <b>2.32 (1.06-5.06)</b> |
|          |                         | <500            | 2.20 (0.54-8.98)        |

| AND TSAT | FERRITIN | <20              | <50              | <100                    | <200                    | <300                    | <500                    |
|----------|----------|------------------|------------------|-------------------------|-------------------------|-------------------------|-------------------------|
| <10      |          | 1.21 (0.17-8.81) | 2.37 (0.74-7.56) | 2.11 (0.77-5.82)        | <b>2.67 (1.07-6.66)</b> | <b>2.67 (1.07-6.66)</b> | <b>2.67 (1.07-6.66)</b> |
| <15      |          | 0.74 (0.10-5.31) | 1.58 (0.76-3.29) | <b>1.92 (1.05-3.49)</b> | <b>1.92 (1.05-3.47)</b> | <b>1.91 (1.05-3.47)</b> | <b>1.69 (0.93-3.07)</b> |
| <20      |          | 0.92 (0.23-3.76) | 0.92 (0.40-2.12) | 1.16 (0.65-2.08)        | <b>1.64 (1.01-2.64)</b> | 1.49 (0.92-2.40)        | 1.28 (0.79-2.06)        |
| <25      |          | 0.92 (0.23-3.76) | 1.16 (0.57-2.34) | 1.23 (0.76-1.99)        | <b>1.65 (1.05-2.59)</b> | <b>1.73 (1.08-2.75)</b> | <b>1.39 (0.87-2.23)</b> |
| <30      |          | 0.92 (0.23-3.76) | 1.48 (0.79-2.76) | 1.52 (0.97-2.39)        | <b>2.29 (1.39-3.75)</b> | <b>2.93 (1.64-5.23)</b> | <b>2.90 (1.49-5.63)</b> |

**Conditional definitions:**

|                                                                       |                         |
|-----------------------------------------------------------------------|-------------------------|
| Ferritin <100 µg/L or TSAT <10% with ferritin 100-199 µg/L            | 1.42 (0.91-2.22)        |
| Ferritin <100 µg/L or TSAT <10% with ferritin 100-299 µg/L            | 1.42 (0.91-2.22)        |
| Ferritin <100 µg/L or TSAT <15% with ferritin 100-199 µg/L            | 1.55 (0.97-2.42)        |
| Ferritin <100 µg/L or TSAT <15% with ferritin 100-299 µg/L            | 1.55 (0.99-2.41)        |
| Ferritin <100 µg/L or TSAT <20% with ferritin 100-199 µg/L (FIND-CKD) | <b>1.82 (1.16-2.86)</b> |
| Ferritin <100 µg/L or TSAT <20% with ferritin 100-299 µg/L (FAIR-HF)  | <b>1.70 (1.08-2.67)</b> |

**Supplemental Table 5.** Different cutoff values of ferritin and TSAT, adjusted for age and sex, with risk of cardiovascular mortality in CKD

patients with eGFR<60 ml/min/1.73m<sup>2</sup>.

| TSAT (%) | HR (95%CI)               | Ferritin (µg/L) | HR (95%CI)              |
|----------|--------------------------|-----------------|-------------------------|
| <10      | <b>5.35 (1.85-15.48)</b> | <20             | 1.08 (0.15-7.89)        |
| <15      | 2.21 (0.96-5.11)         | <50             | 1.53 (0.58-4.00)        |
| <20      | 1.83 (0.92-3.66)         | <100            | <b>2.06 (1.05-4.05)</b> |
| <25      | 1.80 (0.84-3.87)         | <200            | 1.77 (0.77-4.09)        |
| <30      | <b>6.20 (1.48-25.94)</b> | <300            | 2.46 (0.75-8.12)        |
|          |                          | <500            | -                       |

| AND TSAT | FERRITIN | <20               | <50                      | <100                     | <200                     | <300                     | <500                     |
|----------|----------|-------------------|--------------------------|--------------------------|--------------------------|--------------------------|--------------------------|
| <10      |          | 3.27 (0.43-24.68) | <b>6.09 (1.83-20.24)</b> | <b>5.37 (1.86-15.58)</b> | <b>5.37 (1.86-15.53)</b> | <b>5.37 (1.86-15.53)</b> | <b>5.37 (1.86-15.53)</b> |
| <15      |          | 1.80 (0.25-13.15) | 2.61 (0.79-8.61)         | 2.45 (0.94-6.34)         | <b>2.55 (1.10-5.91)</b>  | <b>2.54 (1.09-5.89)</b>  | 2.21 (0.96-5.12)         |
| <20      |          | 1.08 (0.15-7.89)  | 1.55 (0.55-4.42)         | 1.78 (0.80-3.99)         | <b>2.49 (1.24-4.98)</b>  | <b>2.28 (1.14-4.57)</b>  | 1.93 (0.97-3.86)         |
| <25      |          | 1.08 (0.15-7.89)  | 1.30 (0.45-3.73)         | 1.71 (0.85-3.43)         | 1.97 (0.98-3.95)         | <b>2.21 (1.05-4.64)</b>  | 1.92 (0.90-4.12)         |
| <30      |          | 1.08 (0.15-7.89)  | 1.53 (0.58-4.00)         | <b>2.30 (1.17-4.52)</b>  | <b>2.96 (1.33-6.56)</b>  | <b>3.79 (1.46-9.82)</b>  | 6.79 (1.62-28.37)        |

**Conditional definitions:**

|                                                                       |                         |
|-----------------------------------------------------------------------|-------------------------|
| Ferritin <100 µg/L or TSAT <10% with ferritin 100-199 µg/L            | <b>2.06 (1.05-4.05)</b> |
| Ferritin <100 µg/L or TSAT <10% with ferritin 100-299 µg/L            | <b>2.06 (1.05-4.05)</b> |
| Ferritin <100 µg/L or TSAT <15% with ferritin 100-199 µg/L            | <b>2.32 (1.17-4.61)</b> |
| Ferritin <100 µg/L or TSAT <15% with ferritin 100-299 µg/L            | <b>2.32 (1.17-4.60)</b> |
| Ferritin <100 µg/L or TSAT <20% with ferritin 100-199 µg/L (FIND-CKD) | <b>3.27 (1.54-6.77)</b> |
| Ferritin <100 µg/L or TSAT <20% with ferritin 100-299 µg/L (FAIR-HF)  | <b>3.04 (1.44-6.38)</b> |

**Supplemental Table 6.** Different cutoff values of ferritin and TSAT, adjusted for age and sex, with risk of anemia in CKD patients with eGFR<60 ml/min/1.73m<sup>2</sup>.

| TSAT (%) | HR (95%CI)               | Ferritin (µg/L) | HR (95%CI)        |
|----------|--------------------------|-----------------|-------------------|
| <10      | <b>4.80 (1.87-12.31)</b> | <20             | 1.97 (0.61-6.36)  |
| <15      | <b>2.43 (1.29-4.58)</b>  | <50             | 1.32 (0.64-2.72)  |
| <20      | 1.38 (0.82-2.32)         | <100            | 1.57 (0.95-2.60)  |
| <25      | 1.17 (0.68-2.00)         | <200            | 1.52 (0.82-2.83)  |
| <30      | 1.40 (0.75-2.59)         | <300            | 2.39 (0.86-6.62)  |
|          |                          | <500            | 2.76 (0.38-19.89) |

  

| AND TSAT | FERRITIN | <20                      | <50                     | <100                     | <200                     | <300                     | <500                     |
|----------|----------|--------------------------|-------------------------|--------------------------|--------------------------|--------------------------|--------------------------|
| <10      |          | 3.07 (0.71-13.37)        | 3.14 (0.96-10.29)       | <b>4.80 (1.87-12.31)</b> | <b>4.80 (1.87-12.31)</b> | <b>4.80 (1.87-12.31)</b> | <b>4.80 (1.87-12.31)</b> |
| <15      |          | <b>3.81 (1.15-12.59)</b> | <b>3.80 (1.62-8.94)</b> | <b>5.25 (2.68-10.29)</b> | <b>2.96 (1.59-5.50)</b>  | <b>2.74 (1.46-5.16)</b>  | <b>2.43 (1.29-4.58)</b>  |
| <20      |          | 1.97 (0.61-6.36)         | <b>1.52 (0.69-3.35)</b> | <b>2.05 (1.16-3.59)</b>  | <b>1.61 (0.95-2.74)</b>  | <b>1.42 (0.84-2.40)</b>  | <b>1.32 (0.78-2.23)</b>  |
| <25      |          | 1.97 (0.61-6.36)         | 1.26 (0.59-2.67)        | 1.46 (0.86-2.48)         | 1.47 (0.88-2.47)         | 1.20 (0.71-2.02)         | 1.15 (0.68-1.96)         |
| <30      |          | 1.97 (0.61-6.36)         | 1.32 (0.64-2.72)        | 1.49 (0.89-2.51)         | 1.50 (0.88-2.55)         | 1.44 (0.82-2.53)         | 1.39 (0.76-2.53)         |

**Conditional definitions:**

|                                                                       |                  |
|-----------------------------------------------------------------------|------------------|
| Ferritin <100 µg/L or TSAT <10% with ferritin 100-199 µg/L            | 1.58 (0.95-2.60) |
| Ferritin <100 µg/L or TSAT <10% with ferritin 100-299 µg/L            | 1.58 (0.95-2.60) |
| Ferritin <100 µg/L or TSAT <15% with ferritin 100-199 µg/L            | 1.49 (0.90-2.54) |
| Ferritin <100 µg/L or TSAT <15% with ferritin 100-299 µg/L            | 1.44 (0.88-2.37) |
| Ferritin <100 µg/L or TSAT <20% with ferritin 100-199 µg/L (FIND-CKD) | 1.44 (0.87-2.38) |
| Ferritin <100 µg/L or TSAT <20% with ferritin 100-299 µg/L (FAIR-HF)  | 1.30 (0.79-2.15) |
